# Supplementary material for: Microbial Consortium HJ-SH with Very High Degradation Efficiency of Phenanthrene
Source: MDPI journal article supplement (doi:10.3390/microorganisms11102383), 2023-09-23
Supplement: s1 [file s1]

## *Supplementary Material*

### **S1.1. Supplementary Figures**

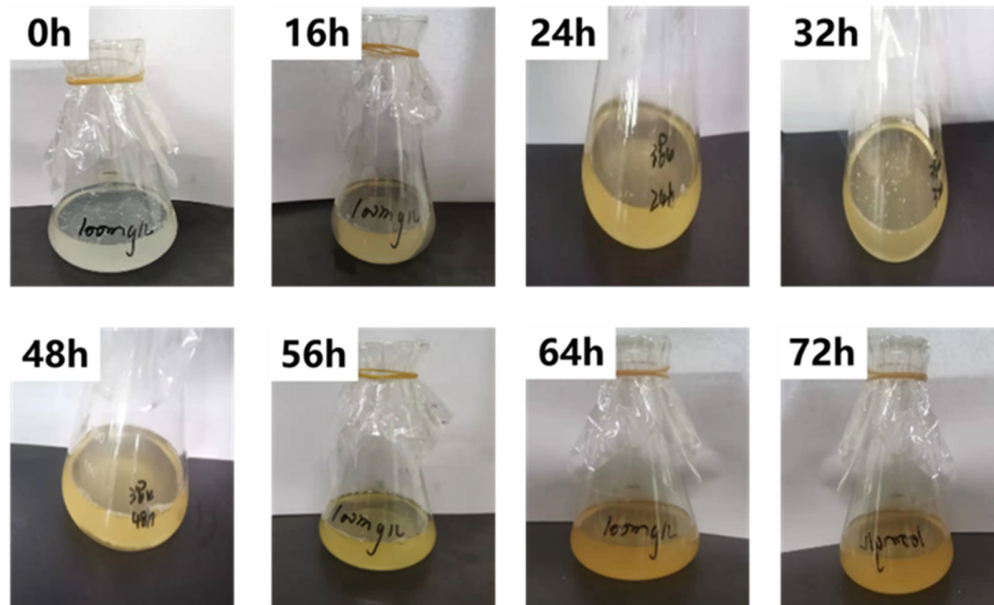

**Supplementary Figure S1.** Changes in culture medium within 72h.

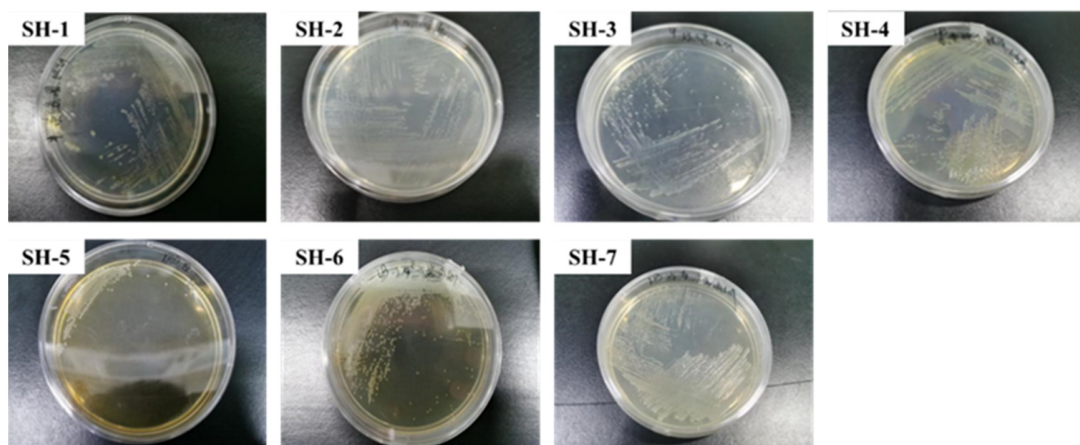

**Supplementary Figure S2.** Plate underlined map of seven single-strains.

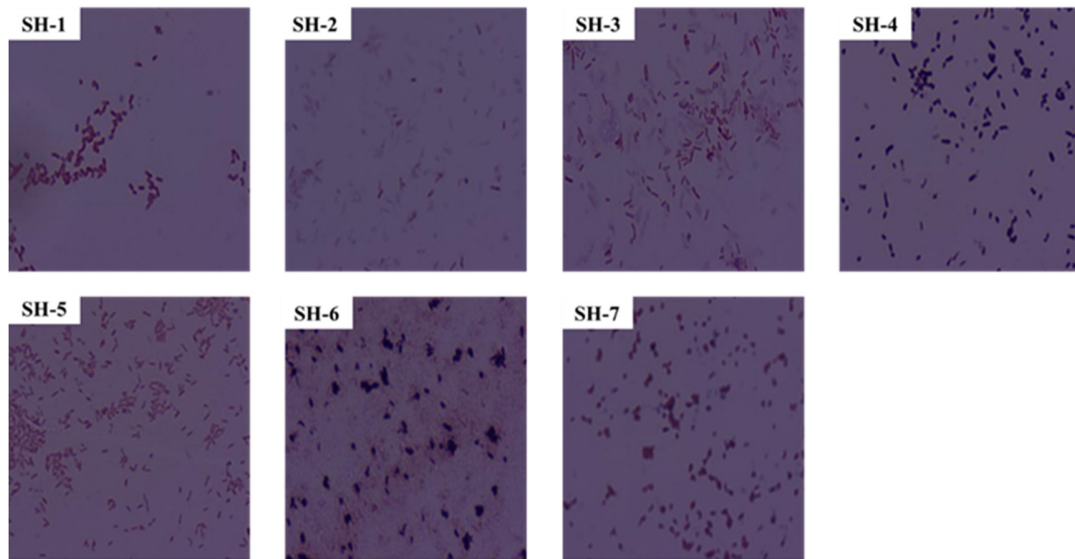

**Supplementary Figure S3.** Gram staining results of seven single-strains.

## S1.2. Supplementary information

### 16S rDNA gene sequence

SH-1

Accession number: OR241333

```

TTTCCCCGTTGGTTACCGTCCTCCCGAAGGTTAGACTAGCTACTTCTGGTGCAACCCACT
CCCATGGTGTGACGGGCGGTGTGTACAAGGCCCGGGAACGTATTCACCGCGACATTCTG
ATTCGCGATTACTAGCGATTCCGACTTCACGCAGTCGAGTTGCAGACTGCGATCCGGACT
ACGATCGGTTTTGTGAGATTAGCTCCACCTCGCGGCTTGGCAACCCTCTGTACCGACCAT
TGTAGCACGTGTGTAGCCCAGGCCGTAAGGGCCATGATGACTTGACGTCATCCCCACCT
TCCTCCGGTTTTGTCACCGGCAGTCTCCTTAGAGTGCCCACCATAACGTGCTGGTAACTAA
GGACAAGGGTTGCGCTCGTTACGGGACTTAACCCAACATCTCACGACACGAGCTGACGA
CAGCCATGCAGCACCTGTGTGTCAGAGTTCCCGAAGGCACCAATCCATCTCTGGAAAGTTC
TCTGCATGTCAAGGCCTGGTAAGGTTCTTCGCGTTGCTTCGAATTAAACCACATGCTCCA
CCGCTTGTGCGGGCCCCCGTCAATTCATTTGAGTTTTAACCTTGCGGGCCGTACTCCCCAG
GCGGTCAACTTAATGCGTTAGCTGCGCCACTAAAATCTCAAGGATTCCAACGGCTAGTT
GACATCGTTTACGGCGTGGACTACCAGGGTATCTAATCCTGTTTGCTCCCCACGCTTTCG
CACCTCAGTGTGAGTATCAGTCCAGGTGGTCGCCTTCGCCACTGGTGTTTCCTTCCTATAT
CTACGCATTTACCGCTACACAGGAAATTCCACCACCCTCTACCGTACTCTAGCTTGCCA
GTTTTGGATGCAGTTCCCAGGTTGAGCCCCGGGGCTTTCACATCCAACCTTAACAAACCACC
TACGCGCGCTTTACGCCCAGTAATTCCGATTAACGCTTGACCCCTCTGTATTACCGCGGC
TGCTGGCACAGAGTTAGCCGGTGCTTATTCTGTGCGGTAACGTCAAAACAGCAAGGTATT
AACTTACTGCCCTTCCTCCCAACTTAAAGTGCTTTACAATCCGAAGACCTTCTTCACACA
CGCGGCATGGCTGGATCAGGCTTTCGCCCATTGTCCAATATTCCCCACTGCTGCCTCCCG

```

TAGGAGTCTGGACCGTGTCTCAGTTCCAGTGTGACTGATCATCCTCTCAGACCAGTTACG  
GATCGTCGCCTTGGTGAGCCATTACCCACCAACTAGCTAATCCGACCTAGGCTCATCTG  
ATAGCGCAAGGCCCGAAGGTCCCCTGCTTTCTCCCGTAGGACGTATGCGGTATTAGCGTT  
CCTTTCGAAACGTTGTCCCCCACTACCAGGCAGATTCTAGGCATTACTACCCGTCCGC  
CGCTGAATCAAGGAGCAAGCTCCCGTCATCCGCTCGACTTGCATGTGTTAGGCCTGCCG  
CCAGCGTTCATCTGACGGGGGGTTTAT

SH-2

Accession number: OR241334

TGGGCAGGCTACCATGCAAGTCGAACGGCAGCACAGGAGAGCTTGCTCTCTGGGTGGCG  
AGTGGCGGACGGGTGAGGAATACATCGGAATCTACTTTTTCTGTTGGGGGATAACGTAGGG  
AACTTACGCTAATACCGCATACGACCTACGGGTGAAAGCAGGGGATCTTCGGACCTTG  
CGCGATTGAATGAGCCGATGTTCGGATTAGCTAGTTGGCGGGGTAAAGGCCACCAAGGC  
GACGATCCGTAGCTGGTCTGAGAGGATGATCAGCCACACTGGAAGTGAACACGGTCCA  
GACTCCTACGGGAGGCAGCAGTGGGGAATATTGGACAATGGGCGCAAGCCTGATCCAG  
CCATACCGCGTGGGTGAAGAAGGCCTTCGGGTGTAAAGCCCTTTTGTGGGAAAGAAA  
TCCAGCTGGTTAATACCCGTTGGGATGACGGTACCCAAAGAATAAGCACCGGCTAACT  
TCGTGCCAGCAGCCGCGTAATACGAAGGGTGCAAGCGTACTCGGAATTACTGGGCGT  
AAAGCGTGCGTAGGTGGTTCGTTTAAGTCCGTTGTGAAAGCCCTGGGCTCAACCTGGGAA  
CTGCAGTGGATACTGGACGACTAGAGTGTGGTAGAGGGTAGCGGAATTCCTGGTGTAGC  
AGTGAAATGCGTAGAGATCAGGAGGAACATCCATGGCGAAGGCAGCTACCTGGACCAA  
CACTGACACTGAGGCACGAAAGCGTGGGGAGCAAACAGGATTAGATACCCTGGTAGTC  
CACGCCCTAAACGATGCGAACTGGATGTTGGGTGCAATTTGGCACGCAGTATCGAAGCT  
AACGCGTTAAGTTCGCCGCCTGGGGAGTACGGTTCGCAAGACTGAAACTCAAAGGAATTG  
ACGGGGGGCCCGCACAAAGCGGTGGAGTATGTGGTTTAATTTCGATGCAACGCGAAGAACCT  
TACCTGGCCTTGACATGTCGAGAACTTTCCAGAGATGGATTGGTGCCTTCGGGAACTCG  
AACACAGGTGCTGCATGGCTGTCGTCAGCTCGTGTGCTGAGATGTTGGGTAAAGTCCCG  
CAACGAGCGCAACCCTTGTCCTTAGTTGCCAGCACGTAATGGTGGGAACTCTAAGGAGA  
CCGCCGGTGACAAACCGGAGGAAGGTGGGGATGACGTCAAGTCATCATGGCCCTTACG  
GCCAGGGCTACACACGTACTACAATGGTAGGGACAGAGGGCTGCAAGCCGGCGACGGT  
AAGCCAATCCAGAAACCCTATCTCAGTCCGGATTGGAGTCTGCAACTCGACTCCATGA  
AGTCGGAATCGCTAGTAATCGCAGATCAGCATTGCTGCGGTGAATACGTTCCCGGGCCT  
TGTACACACCGCCCGTCACACCATGGGAGTTTGTGTCACCAGAAGCAGGTAGCTTAACC  
TTCGGGAGGGCGCTGCCACGGGGTC

SH-3

Accession number: OR241335

GATGCCTTACAATGCAGTCGAACGGTAACAGGTCTTCGGACGCTGACGAGTGGCGAACG  
GGTGAGTAATACATCGGAACGTGCCCAGTCGTGGGGGATAACTACTCGAAAGAGTAGCT  
AATACCGCATACGATCTGAGGATGAAAGCGGGGGACCTTCGGGGCCTCGCGCGATTGGAG  
CGGCCGATGGCAGATTAGGTAGTTGGTGGGATAAAAGCTTACCAAGCCGACGATCTGTA  
GCTGGTCTGAGAGGACGACCAGCCACACTGGGACTGAGACACGGCCCAGACTCCTACG  
GGAGGCAGCAGTGGGGAATTTTGGACAATGGGCGAAAGCCTGATCCAGCAATGCCGCG  
TGCAGGATGAAGGCCTTCGGGTGTAAACTGCTTTTGTACGGAACGAAAAAGCTCCTTC  
TAATACAGGGGGCCCATGACGGTACCGTAAGAATAAGCACCGGCTAACTACGTGCCAGC

AGCCGCGGTAATACGTAGGGTGCGAGCGTTAATCGGAATTACTGGGCGTAAAGCGTGCG  
CAGGCGGTTATGTAAGACAGATGTGAAATCCCCGGGCTCAACCTGGGAACTGCATTTGT  
GACTGCATGGCTAGAGTACGGTAGAGGGGGATGGAATTCCGCGTGTAGCAGTGAAATG  
CGTAGATATGCGGAGGAACACCGATGGCGAAGGCAATCCCCTGGACCTGTACTGACGCT  
CATGCACGAAAGCGTGGGGAGCAAACAGGATTAGATACCCTGGTAGTCCACGCCCTAA  
ACGATGTCAACTGGTTGTTGGGAATTAGTTTTCTCAGTAACGAAGCTAACGCGTGAAGTT  
GACCGCCTGGGGAGTACGGCCGCAAGGTTGAAACTCAAAGGAATTGACGGGGACCCGC  
ACAAGCGGTGGATGATGTGGTTTAATTCGATGCAACGCGAAAAACCTTACCCACCTTTG  
ACATGGCAGGAAGTTTCCAGAGATGGATTTCGTGCTCGAAAGAGAACCTGCACACAGGTG  
CTGCATGGCTGTCGTCAGCTCGTGTCTGAGATGTTGGGTAAAGTCCCGCAACGAGCGC  
AACCCTTGTCATTAGTTGCTACATTCAGTTGAGCACTCTAATGAGACTGCCGGTGACAAA  
CCGGAGGAAGGTGGGGATGACGTCAAGTCCTCATGGCCCTTATAGGTGGGGCTACACAC  
GTCATACAATGGCTGGTACAGAGGGTTGCCAACCCGCGAGGGGGAGCTAATCCCATAAA  
ACCAGTCGTAGTCCGGATCGCAGTCTGCAACTCGACTGCGTGAAGTCGGAATCGCTAGT  
AATCGCGGATCAGCATGCCGCGGTGAATACGTTCCCGGGTCTTGTACACACCGCCCGTC  
ACACCATGGGAGCGGGTCTCGCCAGAAGTAGGTAGCCTAACCGCAAGGAGGGCGCTAC  
CACGACG

SH-4

Accession number: OR241336

GGGGGAGGTCTACCATGCAAGTCGAGCGGATGACGGGAGCTTGCTCCTTGATTCAGCGG  
CGGACGGGTGAGTAATGCCTAGGAATCTGCCTGGTAGTGGGGGACAACGTTTCGAAAGG  
AACGCTAATACCGCATACTCCTACGGGAGAAAGCAGGGGACCTTCGGGCCTTGCGCTA  
TCAGATGAGCCTAGGTCGGATTAGCTAGTTGGTGGGGTAATGGCTCACCAAGGCGACGA  
TCCGTAACCTGGTCTGAGAGGATGATCAGTCACACTGGAAGTGAACACGGTCCAGACTC  
CTACGGGAGGCAGCAGTGGGGAATATTGGACAATGGGCGAAAGCCTGATCCAGCCATG  
CCGCGTGTGTGAAGAAGGTCTTCGGATTGTAAAGCACTTTAAGTTGGGAGGAAGGGCAG  
TAAGTTAATACCTTGCTGTTTTGACGTTACCGACAGAATAAGCACCGGCTAACTCTGTGC  
CAGCAGCCGCGGTAATACAGAGGGTGCAAGCGTTAATCGGAATTACTGGGCGTAAAGC  
GCGCGTAGGTGGTTTGTAAAGTTGGATGTGAAAGCCCCGGGCTCAACCTGGGAACTGCA  
TCCAAAACCTGGCAAGCTAGAGTACGGTAGAGGGTGGTGGGAATTCCTGTGTAGCGGTGA  
AATGCGTAGATATAGGAAGGAACACCAGTGGCGAAGGCGACCACCTGGACTGATACTG  
ACACTGAGGTGCGAAAGCGTGGGGAGCAAACAGGATTAGATACCCTGGTAGTCCACGC  
CGTAAACGATGTCAACTAGCCGTTGGAATCCTTGAGATTTTAGTGGCGCAGCTAACGCA  
TTAAGTTGACCGCCTGGGGAGTACGGCCGCAAGGTTAAACTCAAATGAATTGACGGGG  
GCCCCGACAAGCGGTGGAGCATGTGGTTTAATTCGAAGCAACGCGAAGAACCTTACCAG  
GCCTTGACATGCAGAGAACTTTCCAGAGATGGATTGGTGCCTTCGGGAACTCTGACACA  
GGTGCTGCATGGCTGTCGTCAGCTCGTGTCTGAGATGTTGGGTAAAGTCCCGTAACGA  
GCGCAACCCTTGTCCTTAGTTACCAGCACGTTATGGTGGGCACTCTAAGGAGACTGCCG  
GTGACAAACCGGAGGAAGGTGGGGATGACGTCAAGTCATCATGGCCCTTACGGCCTGG  
GCTACACACGTGCTACAATGGTCGGTACAGAGGGTTGCCAAGCCGCGAGGTGGAGCTAA  
TCTCACAAAACCGATCGTAGTCCGGATCGCAGTCTGCAACTCGACTGCGTGAAGTCGGA  
ATCGCTAGTAATCGCGAATCAGAATGTCGCGGTGAATACGTTCCCGGGCCTTGTACACA  
CCGCCCCGTCACACCATGGGAGTGGGTTGCACCAGAAGTAGCTAGTCTAACCTTCGGGAG  
GACGGTACCACGGGGATA

SH-5

Accession number: OR241337

GTGCGGAGGACTACCATGCAGTCGAACGGACCCTTCGGGGTTAGTGGCGGACGGGTGA  
GTAACACGTGGGAACGTGCCTTTAGGTTTCGGAATAGCTCCTGGAAACGGGTGGTAATGC  
CGAATGTGCCCTTCGGGGGAAAGATTTATCGCCTTTAGAGCGGCCCGCGTCTGATTAGCT  
AGTTGGTGAGGTAACGGCTCACCAAGGCGACGATCAGTAGCTGGTCTGAGAGGATGACC  
AGCCACACTGGGACTGAGACACGGCCCAGACTCCTACGGGAGGCAGCAGTGGGGAATC  
TTGCGCAATGGGCGAAAGCCTGACGCAGCCATGCCGCGTGAATGATGAAGGTCTTAGGA  
TTGTAATAATTCTTTCACCGGGGACGATAATGACGGTACCCGGAGAAGAAGCCCCGGCTA  
ACTTCGTGCCAGCAGCCGCGGTAATACGAAGGGGGCTAGCGTTGCTCGGAATTACTGGG  
CGTAAAGGGCGCGTAGGCGGATCGTTAAGTCAGAGGTGAAATCCCAGGGCTCAACCCTG  
GAACTGCCTTTGATACTGGCGATCTTGAGTATGAGAGAGGTATGTGGAACCTCCGAGTGT  
AGAGGTGAAATTCGTAGATATTCGGAAGAACACCAGTGGCGAAGGCGACATACTGGCT  
CATTACTGACGCTGAGGCGCGAAAGCGTGGGGAGCAAACAGGATTAGATACCCTGGTA  
GTCCACGCCGTAAACGATGATTGCTAGTTGTCGGGCTGCATGCAGTTCGGTGACGCAGC  
TAACGCATTAAGCAATCCGCCTGGGGAGTACGGTCGCAAGATTAAAACTCAAAGGAATT  
GACGGGGGCCCCGCACAAGCGGTGGAGCATGTGGTTTAATTCGAAGCAACGCGCAGAAC  
CTTACCACCTTTTGACATGCCTGGACCGCCACGGAGACGTGGCTTTCCCTTCGGGGACTA  
GGACACAGGTGCTGCATGGCTGTCGTCAGCTCGTGTCTGAGATGTTGGGTAAAGTCCC  
GCAACGAGCGCAACCCTCGCCATTAGTTGCCATCATTTAGTTGGGAACTCTAATGGGAC  
TGCCGGTGCTAAGCCGGAGGAAGGTGGGGATGACGTCAAGTCCTCATGGCCCTTACAGG  
GTGGGCTACACACGTGCTACAATGGCAACTACAGAGGGTTAATCCTTAAAAGTTGTCTC  
AGTTCGGATTGTCTCTGCAACTCGAGGGCATGAAGTTGGAATCGCTAGTAATCGCGGA  
TCAGCATGCCGCGGTGAATACGTTCCCGGGCCTTGTACACACCGCCCCGTACACCATGG  
GAGTTGGTTCTACCCGAAGGCGGTGCGCTAACCAGCAATGGAGGCAGCCGACCACGTGG  
TTC

SH-6

Accession number: OR241338

TGCGAGTGCTTACCTGCAGTCGAACGATGATCAGGAGCTTGCTCCTGTGATTAGTGGCG  
AACGGGTGAGTAACACGTGAGTAACCTGCCCTGACTCTGGGATAAGCGTTGGAAACGA  
CGTCTAATACTGGATATGATCACTGGCCGCATGGTCTGGTGGTGGAAAGATTTTTTGGTT  
GGGGATGGACTCGCGGCCTATCAGCTTGTTGGTGAGGTAATGGCTCACCAAGGCGACGA  
CGGGTAGCCGGCCTGAGAGGGTGACCGGCCACACTGGGACTGAGACACGGCCCAGACT  
CCTACGGGAGGCAGCAGTGGGGAATATTGCACAATGGGCGAAAGCCTGATGCAGCAAC  
GCCGCGTGAGGGATGACGGCCTTCGGGTTGTAAACCTCTTTTAGTAGGGAAGAAGCGAG  
AGTGACGGTACCTGCAGAAAAAGCACCGGCTAACTACGTGCCAGCAGCCGCGGTAATA  
CGTAGGGTGCAAGCGTTGTCCGGAATTATTGGGCGTAAAGAGCTCGTAGGCGGTTTGTC  
GCGTCTGCTGTGAAATCCCAGAGGCTCAACCTCGGGCTTGCAAGTGGGTACGGGCAGACTA  
GAGTGCGGTAGGGGAGATTGGAATTCCTGGTGTAGCGGTGGAATGCGCAGATATCAGG  
AGGAACACCGATGGCGAAGGCAGATCTCTGGGCCGTAAGTACGCTGAGGAGCGAAAG  
CGTGGGGAGCGAACAGGATTAGATACCCTGGTAGTCCACGCCGTAAACGTTGGGCGCTA  
GATGTAGGGACCTTTCCACGGTTTCTGTGTCGTAGCTAACGCATTAAGCGCCCCGCCTGG  
GGAGTACGGCCGCAAGGCTAAAACTCAAAGGAATTGACGGGGGCCCCGCACAAGCGGCG  
GAGCATGCGGATTAATTTCGATGCAACGCGAAGAACCTTACCAAGGCTTGACATACACCG

GAAACGGCCAGAGATGGTCGCCCCCTTGTGGTCGGTGTACAGGTGGTGCATGGTTGTCTG  
TCAGCTCGTGTCTGAGATGTTGGGTAAAGTCCCGCAACGAGCGCAACCCTCGTTCTATG  
TTGCCAGCGCGTTATGGCGGGGACTCATAGGAGACTGCCGGGGTCAACTCGGAGGAAG  
GTGGGGATGACGTCAAATCATCATGCCCCTTATGTCTTGGGCTTCACGCATGCTACAATG  
GCCGGTACAAAGGGCTGCGATACCGTAAGGTGGAGCGAATCCCCAAAAGCCGGTCTCA  
GTTTCGGATTGAGGTCTGCAACTCGACCTCATGAAGTCGGAGTCGCTAGTAATCGCAGAT  
CAGCAACGCTGCGGTGAATACGTTCCCGGGCCTTGTACACACCGCCCGTCAAGTCATGA  
AAGTCGGTAACACCCGAAGCCGGTGGCCTAACCCCTTGTGGGAGGAGCCGTCGAAGGGC  
ATT

SH-7

Accession number: OR241339

TGCGGGGTGCTTACCATGCAAGTCGAACGGTGAAGCAGGAGCTTGCTCTTGTGGATCAG  
TGCGCAACGGGTGAGTAACACGTGAGCAACCTGCCCCTGACTCTGGGATAAGCGCTGGA  
AACGGCGTCTAATACTGGATATGTGACGTGACCGCATGGTCTGCGTTTGGAAAGATTTTT  
CGGTTGGGGATGGGCTCGCGGCCTATCAGCTTGTTGGTGAGGTAATGGCTCACCAAGGC  
GTCGACGGGTAGCCGGCCTGAGAGGGTGACCGGCCACACTGGGACTGAGACACGGCCC  
AGACTCCTACGGGAGGCAGCAGTGGGGAATATTGCACAATGGGCGAAAGCCTGATGCA  
GCAACGCCGCGTGAGGGATGACGGCCTTCGGGTTGTAAACCTCTTTTAGCAGGGAAGAA  
GCGAAAGTGACGGTACCTGCAGAAAAAGCGCCGGCTAACTACGTGCCAGCAGCCGCGG  
TAATACGTAGGGCGCAAGCGTTATCCGGAATTATTGGGCGTAAAGAGCTCGTAGGCGGT  
TTGTCGCGTCTGCTGTGAAATCCCGAGGCTCAACCTCGGGCCTGCAGTGGGTACGGGCA  
GACTAGAGTGCGGTAGGGGAGATTGGAATTCCTGGTGTAGCGGTGGAATGCGCAGATAT  
CAGGAGGAACACCGATGGCGAAGGCAGATCTCTGGGCCGTAAGTACGCTGAGGAGCG  
AAAGGGTGGGGAGCAAACAGGCTTAGATACCCTGGTAGTCCACCCCGTAAACGTTGGG  
AACTAGTTGTGGGGTCCATTCCACGGATTCCGTGACGCAGCTAACGCATTAAGTTCCTCCG  
CCTGGGGAGTACGGCCGCAAGGCTAAACTCAAAGGAATTGACGGGGACCCGCACAAG  
CGGCGGAGCATGCGGATTAATTCGATGCAACGCGAAGAACCTTACCAAGGCTTGACATA  
TACGAGAACGGGCCAGAAATGGTCAACTCTTTGGACACTCGTAAACAGGTGGTGCATGG  
TTGTCGTCAGCTCGTGTCTGAGATGTTGGGTAAAGTCCCGCAACGAGCGCAACCCTCGT  
TCTATGTTGCCAGCACGTAATGGTGGGAACTCATGGGATACTGCCGGGGTCAACTCGGA  
GGAAGGTGGGGATGACGTCAAATCATCATGCCCCTTATGTCTTGGGCTTCACGCATGCT  
ACAATGGCCGGTACAAAGGGCTGCAATACCGTGAGGTGGAGCGAATCCCCAAAAGCCG  
GTCCAGTTCGGATTGAGGTCTGCAACTCGACCTCATGAAGTCGGAGTCGCTAGTAATC  
GCAGATCAGCAACGCTGCGGTGAATACGTTCCCGGGTCTTGTACACACCGCCCGTCAAG  
TCATGAAAGTCGGTAACACCTGAAGCCGGTGGCCTAACCCCTTGTGGAGGGAGCCGTCGA  
AGGGTAT

S1.3. Supplementary Tables

Supplementary Table S1. Data of PHE degradation ratio

|           | 8 h         | 16 h        | 24 h        | 32 h        | 40 h        | 48 h        | 56 h        | 64 h        | 72 h        |
|-----------|-------------|-------------|-------------|-------------|-------------|-------------|-------------|-------------|-------------|
| HJ-SH     | 0.128±0.009 | 0.24±0.015  | 0.472±0.021 | 0.664±0.032 | 0.919±0.04  | 0.924±0.052 | 0.931±0.035 | 0.945±0.022 | 0.981±0.015 |
| HJ-7      | 0.045±0.005 | 0.15±0.009  | 0.328±0.026 | 0.432±0.065 | 0.464±0.052 | 0.859±0.045 | 0.895±0.055 | 0.899±0.035 | 0.938±0.017 |
| HJ-SH1(-) | 0.01±0.009  | 0.021±0.013 | 0.023±0.021 | 0.027±0.026 | 0.059±0.025 | 0.2±0.019   | 0.121±0.026 | 0.237±0.021 | 0.331±0.039 |
| HJ-SH2(-) | 0.073±0.019 | 0.084±0.027 | 0.09±0.029  | 0.104±0.019 | 0.134±0.031 | 0.253±0.029 | 0.295±0.025 | 0.342±0.036 | 0.292±0.047 |
| HJ-SH3(-) | 0.031±0.023 | 0.024±0.019 | 0.135±0.027 | 0.115±0.031 | 0.141±0.012 | 0.216±0.009 | 0.237±0.007 | 0.243±0.029 | 0.387±0.037 |
| HJ-SH4(-) | 0.004±0.002 | 0.016±0.013 | 0.021±0.02  | 0.029±0.023 | 0.036±0.025 | 0.156±0.048 | 0.181±0.036 | 0.181±0.028 | 0.225±0.014 |
| HJ-SH5(-) | 0.01±0.001  | 0.011±0.005 | 0.057±0.014 | 0.07±0.021  | 0.069±0.028 | 0.11±0.04   | 0.13±0.026  | 0.254±0.022 | 0.299±0.04  |
| HJ-SH6(-) | 0.024±0.021 | 0.036±0.035 | 0.058±0.032 | 0.077±0.026 | 0.101±0.036 | 0.124±0.041 | 0.149±0.043 | 0.307±0.045 | 0.596±0.037 |
| HJ-SH7(-) | 0.002±0.001 | 0.04±0.019  | 0.075±0.007 | 0.127±0.015 | 0.113±0.029 | 0.144±0.03  | 0.194±0.033 | 0.228±0.047 | 0.354±0.02  |
| HJ-1      | 0.009±0.015 | 0.011±0.025 | 0.023±0.023 | 0.044±0.036 | 0.053±0.049 | 0.058±0.032 | 0.115±0.029 | 0.12±0.031  | 0.155±0.041 |
| HJ-2      | 0.001±0.001 | 0.018±0.017 | 0.023±0.024 | 0.041±0.014 | 0.053±0.029 | 0.056±0.037 | 0.084±0.028 | 0.084±0.03  | 0.122±0.039 |

|      |              |             |             |             |             |             |             |             |             |
|------|--------------|-------------|-------------|-------------|-------------|-------------|-------------|-------------|-------------|
| HJ-3 | 0.002±0.001  | 0.012±0.021 | 0.028±0.018 | 0.052±0.034 | 0.078±0.025 | 0.127±0.036 | 0.123±0.033 | 0.132±0.028 | 0.161±0.019 |
| HJ-4 | 0.020±0.002  | 0.059±0.023 | 0.041±0.036 | 0.066±0.025 | 0.066±0.026 | 0.068±0.029 | 0.096±0.027 | 0.184±0.037 | 0.378±0.041 |
| HJ-5 | 0.014±0.0021 | 0.01±0.031  | 0.035±0.039 | 0.049±0.037 | 0.067±0.029 | 0.092±0.048 | 0.103±0.027 | 0.076±0.025 | 0.131±0.032 |
| HJ-6 | 0.04±0.017   | 0.058±0.019 | 0.043±0.029 | 0.047±0.037 | 0.067±0.036 | 0.076±0.025 | 0.092±0.032 | 0.127±0.039 | 0.076±0.019 |
| HJ-7 | 0.007±0.001  | 0.011±0.025 | 0.023±0.029 | 0.048±0.03  | 0.043±0.032 | 0.093±0.033 | 0.118±0.023 | 0.153±0.037 | 0.214±0.02  |

Supplementary Table S2. Data of OD<sub>600</sub>

|           |             |             |             |             |             |             |             |             |             |
|-----------|-------------|-------------|-------------|-------------|-------------|-------------|-------------|-------------|-------------|
|           | 8 h         | 16 h        | 24 h        | 32 h        | 40 h        | 48 h        | 56 h        | 64 h        | 72 h        |
| HJ-SH     | 0.258±0.015 | 0.441±0.035 | 0.82±0.049  | 1.123±0.055 | 1.778±0.062 | 1.976±0.098 | 2.625±0.102 | 2.888±0.082 | 2.455±0.119 |
| HJ-7      | 0.198±0.01  | 0.401±0.037 | 0.759±0.031 | 0.883±0.051 | 1.102±0.06  | 1.795±0.059 | 2.197±0.098 | 2.757±0.088 | 2.45±0.095  |
| HJ-SH1(-) | 0.567±0.033 | 0.609±0.027 | 0.617±0.025 | 1.075±0.037 | 1.525±0.046 | 1.516±0.047 | 1.782±0.066 | 2.075±0.104 | 1.536±0.099 |
| HJ-SH2(-) | 0.393±0.026 | 0.478±0.014 | 0.504±0.036 | 1.046±0.07  | 1.327±0.097 | 1.512±0.087 | 1.93±0.102  | 2.07±0.075  | 1.527±0.07  |
| HJ-SH3(-) | 0.373±0.014 | 0.356±0.021 | 0.942±0.058 | 1.342±0.07  | 1.547±0.06  | 1.939±0.09  | 2.035±0.105 | 2.248±0.112 | 1.839±0.07  |
| HJ-SH4(-) | 0.22±0.019  | 0.273±0.021 | 0.893±0.06  | 1.308±0.068 | 1.456±0.069 | 1.602±0.079 | 1.892±0.057 | 1.703±0.07  | 1.284±0.099 |



|           |             |             |             |             |             |             |             |             |             |
|-----------|-------------|-------------|-------------|-------------|-------------|-------------|-------------|-------------|-------------|
| HJ-SH5(-) | 0.871±0.039 | 0.972±0.078 | 1.272±0.079 | 1.558±0.082 | 1.685±0.059 | 1.716±0.036 | 1.787±0.069 | 1.816±0.108 | 1.684±0.079 |
| HJ-SH6(-) | 0.882±0.048 | 0.882±0.039 | 1.139±0.089 | 1.777±0.088 | 1.803±0.098 | 1.818±0.056 | 1.995±0.103 | 2.023±0.112 | 1.806±0.069 |
| HJ-SH7(-) | 0.95±0.033  | 1.057±0.05  | 1.282±0.057 | 1.788±0.088 | 1.812±0.07  | 2.085±0.102 | 2.262±0.124 | 2.264±0.097 | 2.211±0.087 |
| HJ-1      | 0.258±0.035 | 0.269±0.037 | 0.488±0.026 | 0.689±0.045 | 0.723±0.069 | 0.856±0.053 | 0.964±0.044 | 0.825±0.052 | 0.778±0.07  |
| HJ-2      | 0.385±0.026 | 0.789±0.033 | 0.857±0.07  | 0.889±0.019 | 0.879±0.052 | 0.949±0.064 | 0.984±0.078 | 0.895±0.099 | 0.896±0.078 |
| HJ-3      | 0.457±0.019 | 0.694±0.021 | 0.878±0.037 | 0.932±0.059 | 1.096±0.065 | 1.079±0.066 | 1.295±0.075 | 1.176±0.026 | 1.115±0.037 |
| HJ-4      | 0.458±0.026 | 0.596±0.037 | 0.789±0.048 | 0.965±0.051 | 0.956±0.047 | 1.198±0.046 | 1.287±0.06  | 1.359±0.12  | 1.299±0.052 |
| HJ-5      | 0.296±0.021 | 0.479±0.013 | 0.525±0.04  | 0.726±0.046 | 0.969±0.069 | 0.957±0.098 | 0.969±0.079 | 1.017±0.065 | 0.911±0.042 |
| HJ-6      | 0.255±0.014 | 0.268±0.025 | 0.487±0.014 | 0.579±0.05  | 0.596±0.055 | 0.688±0.078 | 0.956±0.106 | 0.969±0.099 | 0.823±0.053 |
| HJ-7      | 0.225±0.013 | 0.397±0.026 | 0.461±0.037 | 0.467±0.035 | 0.523±0.037 | 0.669±0.059 | 0.796±0.043 | 0.709±0.012 | 0.708±0.07  |

**Supplementary Table S3.** Data of relative PHE degradation rate

|       | 8 h         | 16 h        | 24 h        | 32 h        | 40 h        | 48 h        | 56 h        | 64 h        | 72 h        |
|-------|-------------|-------------|-------------|-------------|-------------|-------------|-------------|-------------|-------------|
| HJ-SH | 0.498±0.015 | 0.545±0.009 | 0.576±0.02  | 0.591±0.001 | 0.517±0.006 | 0.468±0.026 | 0.355±0.013 | 0.327±0.002 | 0.4±0.015   |
| HJ-7  | 0.231±0.031 | 0.379±0.053 | 0.431±0.016 | 0.487±0.048 | 0.422±0.052 | 0.478±0.01  | 0.408±0.022 | 0.326±0.014 | 0.383±0.012 |

|           |             |             |             |             |             |             |             |             |             |
|-----------|-------------|-------------|-------------|-------------|-------------|-------------|-------------|-------------|-------------|
| HJ-SH1(-) | 0.036±0.008 | 0.041±0.007 | 0.048±0.006 | 0.063±0.009 | 0.074±0.011 | 0.067±0.012 | 0.119±0.016 | 0.146±0.026 | 0.199±0.025 |
| HJ-SH2(-) | 0.003±0.001 | 0.023±0.003 | 0.027±0.009 | 0.046±0.017 | 0.06±0.024  | 0.059±0.022 | 0.085±0.026 | 0.094±0.019 | 0.136±0.017 |
| HJ-SH3(-) | 0.004±0.003 | 0.017±0.005 | 0.032±0.014 | 0.055±0.017 | 0.071±0.015 | 0.118±0.022 | 0.095±0.026 | 0.112±0.028 | 0.144±0.017 |
| HJ-SH4(-) | 0.043±0.005 | 0.099±0.005 | 0.051±0.015 | 0.068±0.017 | 0.069±0.017 | 0.057±0.02  | 0.075±0.014 | 0.135±0.017 | 0.291±0.025 |
| HJ-SH5(-) | 0.047±0.01  | 0.021±0.02  | 0.067±0.02  | 0.068±0.021 | 0.07±0.015  | 0.096±0.009 | 0.106±0.017 | 0.075±0.027 | 0.144±0.02  |
| HJ-SH6(-) | 0.157±0.012 | 0.217±0.01  | 0.087±0.022 | 0.081±0.022 | 0.113±0.025 | 0.11±0.014  | 0.096±0.026 | 0.131±0.028 | 0.092±0.017 |
| HJ-SH7(-) | 0.031±0.008 | 0.028±0.012 | 0.049±0.014 | 0.103±0.022 | 0.083±0.017 | 0.139±0.026 | 0.148±0.031 | 0.216±0.024 | 0.303±0.022 |
| HJ-1      | 0.036±0.007 | 0.041±0.012 | 0.048±0.045 | 0.063±0.04  | 0.074±0.036 | 0.067±0.03  | 0.119±0.033 | 0.146±0.03  | 0.199±0.029 |
| HJ-2      | 0.003±0.001 | 0.023±0.026 | 0.027±0.014 | 0.046±0.037 | 0.06±0.028  | 0.059±0.029 | 0.085±0.018 | 0.094±0.015 | 0.136±0.025 |
| HJ-3      | 0.004±0.002 | 0.017±0.028 | 0.032±0.024 | 0.055±0.029 | 0.071±0.019 | 0.118±0.027 | 0.095±0.022 | 0.112±0.055 | 0.144±0.026 |
| HJ-4      | 0.043±0.035 | 0.099±0.031 | 0.051±0.038 | 0.068±0.024 | 0.069±0.028 | 0.057±0.032 | 0.075±0.023 | 0.135±0.015 | 0.291±0.039 |
| HJ-5      | 0.047±0.027 | 0.021±0.036 | 0.067±0.041 | 0.068±0.041 | 0.07±0.021  | 0.096±0.024 | 0.106±0.017 | 0.075±0.019 | 0.144±0.038 |
| HJ-6      | 0.157±0.063 | 0.217±0.038 | 0.087±0.107 | 0.081±0.037 | 0.113±0.033 | 0.11±0.016  | 0.096±0.015 | 0.131±0.02  | 0.092±0.018 |
| HJ-7      | 0.031±0.022 | 0.028±0.019 | 0.049±0.026 | 0.103±0.043 | 0.083±0.043 | 0.139±0.028 | 0.148±0.027 | 0.216±0.054 | 0.303±0.014 |

**Supplementary Table S4.** Data of PHE tolerance experiment

|                   | 12 h        | 24 h        | 36 h        | 48 h        | 60 h        | 72 h        | 84 h        | 96 h        | 108 h       | 120h        |
|-------------------|-------------|-------------|-------------|-------------|-------------|-------------|-------------|-------------|-------------|-------------|
| Degradation ratio |             |             |             |             |             |             |             |             |             |             |
| 1 g/L             | 0.104±0.01  | 0.313±0.025 | 0.428±0.021 | 0.446±0.027 | 0.513±0.037 | 0.668±0.032 | 0.755±0.027 | 0.877±0.025 | 0.911±0.028 | 0.926±0.037 |
| 2 g/L             | 0.079±0.011 | 0.201±0.014 | 0.328±0.021 | 0.309±0.02  | 0.396±0.023 | 0.409±0.022 | 0.596±0.031 | 0.779±0.023 | 0.89±0.039  | 0.9±0.032   |
| 3 g/L             | 0.056±0.018 | 0.118±0.022 | 0.158±0.025 | 0.208±0.011 | 0.338±0.017 | 0.349±0.021 | 0.394±0.036 | 0.502±0.022 | 0.518±0.04  | 0.509±0.022 |
| 4 g/L             | 0.012±0.004 | 0.051±0.011 | 0.098±0.013 | 0.103±0.02  | 0.15±0.015  | 0.198±0.014 | 0.208±0.012 | 0.27±0.029  | 0.307±0.031 | 0.307±0.022 |
| 4.5 g/L           | 0.009±0.005 | 0.058±0.02  | 0.076±0.011 | 0.088±0.016 | 0.096±0.018 | 0.158±0.022 | 0.169±0.027 | 0.159±0.031 | 0.18±0.021  | 0.181±0.033 |
| OD <sub>600</sub> |             |             |             |             |             |             |             |             |             |             |
| 1 g/L             | 0.189±0.103 | 0.371±0.151 | 0.903±0.211 | 1.479±0.269 | 1.828±0.111 | 2.102±0.123 | 2.302±0.197 | 2.311±0.152 | 2.41±0.275  | 2.568±0.166 |
| 2 g/L             | 0.13±0.112  | 0.291±0.136 | 0.749±0.106 | 1.261±0.196 | 1.484±0.123 | 1.962±0.219 | 2.25±0.209  | 2.411±0.127 | 2.509±0.293 | 2.432±0.118 |
| 3 g/L             | 0.078±0.177 | 0.258±0.119 | 0.666±0.253 | 1.128±0.112 | 1.313±0.169 | 1.503±0.109 | 1.589±0.155 | 1.647±0.121 | 1.698±0.196 | 1.728±0.215 |
| 4 g/L             | 0.059±0.12  | 0.28±0.111  | 0.584±0.125 | 0.743±0.203 | 0.824±0.154 | 0.976±0.142 | 1.059±0.116 | 1.093±0.293 | 0.809±0.209 | 0.801±0.124 |
| 4.5 g/L           | 0.049±0.113 | 0.124±0.091 | 0.223±0.109 | 0.276±0.126 | 0.371±0.178 | 0.517±0.115 | 0.586±0.097 | 0.669±0.113 | 0.575±0.109 | 0.484±0.127 |

**Supplementary Table S5.** Data of degradation ratio

|            | 12 h        | 24 h        | 36 h        | 48 h        | 60 h        | 72 h       | 84 h        | 96 h        | 108 h       | 120h        |
|------------|-------------|-------------|-------------|-------------|-------------|------------|-------------|-------------|-------------|-------------|
| Biphenyl   | 0.198±0.026 | 0.251±0.02  | 0.396±0.026 | 0.498±0.026 | 0.666±0.036 | 0.737±0.05 | 0.87±0.04   | 0.898±0.056 | 0.921±0.069 | 0.931±0.042 |
| Anthracene | 0.109±0.029 | 0.18±0.013  | 0.276±0.01  | 0.38±0.026  | 0.6±0.038   | 0.71±0.034 | 0.78±0.042  | 0.805±0.051 | 0.896±0.046 | 0.916±0.04  |
| Hexadecane | 0.058±0.018 | 0.097±0.026 | 0.152±0.018 | 0.18±0.033  | 0.209±0.04  | 0.36±0.041 | 0.476±0.033 | 0.549±0.058 | 0.66±0.054  | 0.701±0.046 |
